# Supplementary material
Source: publisher site journal article supplement (https://www.spandidos-publications.com/7552/downloadSupplementary)
Supplement: Supplementary file 1 [file downloadSupplementary]

Table SI. BLID enhances chemosensitivity of breast cancer cells.

| Treatment                                                      | DTX, IC <sub>50</sub> (nM) |                  | DXR, IC <sub>50</sub> (ng/ml) |                  |
|----------------------------------------------------------------|----------------------------|------------------|-------------------------------|------------------|
|                                                                | SKBr3 cells                | MDA-MB-231 cells | SKBr3 cells                   | MDA-MB-231 cells |
| UT                                                             | 7.00                       | 0.90             | 50.00                         | 50.00            |
| Liposomes only (scL)                                           | 6.50                       | 1.00             | 43.00                         | 40.00            |
| scL vector                                                     | 6.00                       | 0.85             | 42.00                         | 40.00            |
| scLBLID                                                        | 0.06                       | 0.02             | 00.39                         | 12.00            |
| Fold-sensitization (IC <sub>50</sub> UT/IC <sub>50</sub> BLID) | 117                        | 36               | 128                           | 4.20             |

A total of  $4 \times 10^3$  SKBr3 and MDA-MB-231 breast cancer cells were plated per well in 96-well plates. After 24 h, the cells were transfected with scLBLID nanocomplex, scL vector or liposomes only, or left UT [vector or BLID plasmid DNA/well, 0.02  $\mu$ g (SKBr3 cells) or 0.06  $\mu$ g (MDA-MB-231 cells)]. At 2 days after transfection, DTX or DXR was added at increasing concentrations (in triplicate) for 48 h. An XTT assay was performed at 48 h post-incubation of cells with the drug, and the IC<sub>50</sub> value, which is the drug concentration yielding a 50% loss of cell viability, was calculated. scL, immunoliposomal nanocomplex of anti-transferrin receptor single chain (TfRscFv) antibody fragment and cationic liposome; UT, untransfected; DTX, docetaxel; DXR, doxorubicin; BLID, BH-3 like motif containing inducer of cell death.

Table SII. Comparison of chemosensitization effects of scLBLID and scLP53 in MDA-MB-231 cells.

| Treatment                                                                  | DTX, IC <sub>50</sub> (nM) |        | DXR, IC <sub>50</sub> (ng/ml) |        |
|----------------------------------------------------------------------------|----------------------------|--------|-------------------------------|--------|
|                                                                            | scLBLID                    | scLP53 | scLBLID                       | scLP53 |
| UT                                                                         | 0.95                       | 0.95   | 35.00                         | 35.00  |
| scL nanoparticle                                                           | 0.02                       | 0.03   | 4.20                          | 15.00  |
| Fold-sensitization (IC <sub>50</sub> UT/IC <sub>50</sub> scL nanoparticle) | 47.50                      | 29.70  | 8.30                          | 2.30   |

A total of  $4 \times 10^3$  MDA-MB-231 breast cancer cells were plated per well in 96-well plates. After 24 h, the cells were transfected with 0.06  $\mu$ g plasmid DNA/well of the scLBLID or scLP53 nanocomplex or left UT. At 2 days after transfection, DTX or DXR was added at increasing concentrations (in triplicate) for 48 h. An XTT assay was performed at 48 h post-incubation of cells with the drug, and the IC<sub>50</sub> value, which is the drug concentration yielding a 50% loss of cell viability, was calculated. scL, immunoliposomal nanocomplex of anti-transferrin receptor single chain (TfRscFv) antibody fragment and cationic liposome; UT, untransfected; DTX, docetaxel; DXR, doxorubicin; BLID, BH-3 like motif containing inducer of cell death.

Table SIII. RNA array analysis-based identification of top-ranked genes modulated in BLID shRNA- vs. scrambled control shRNA-transduced MCF-7 cells.

| A, Upregulated genes                                                                                         |                                                                              |                        |
|--------------------------------------------------------------------------------------------------------------|------------------------------------------------------------------------------|------------------------|
| Gene symbol (gene name; RefSeq accession number)                                                             | Fold increase/decrease<br>(BLID shRNA vs. scrambled<br>shRNA in MCF-7 cells) | P-value                |
| AKR1C2 (aldo-keto reductase family 1, member C2; NM_001135241)                                               | +26.8375                                                                     | 5.70x10 <sup>-11</sup> |
| RSAD2 (radical S-adenosyl methionine domain containing 2; NM_080657)                                         | +26.7917                                                                     | 3.94x10 <sup>-10</sup> |
| AKR1C1 (aldo-keto reductase family 1, member C1; NM_001353)                                                  | +22.0086                                                                     | 2.66x10 <sup>-10</sup> |
| IFIT2 (interferon-induced protein with tetratricopeptide repeats 2; NM_001547)                               | +17.0637                                                                     | 1.70x10 <sup>-9</sup>  |
| IFIT3 (interferon-induced protein with tetratricopeptide repeats 3; NM_001031683)                            | +16.6726                                                                     | 2.05x10 <sup>-9</sup>  |
| CMPK2 [cytidine monophosphate (UMP-CMP) kinase 2; NM_001256477]                                              | +14.5695                                                                     | 4.39x10 <sup>-9</sup>  |
| IFNL2 (interferon, $\lambda$ 2; NM_172138)                                                                   | +12.7334                                                                     | 1.15x10 <sup>-15</sup> |
| AKR1C3 (aldo-keto reductase family 1; NM_001253908)                                                          | +12.5724                                                                     | 1.86x10 <sup>-7</sup>  |
| IFNB1 (interferon, $\beta$ 1; NM_002176)                                                                     | +10.0024                                                                     | 1.08x10 <sup>-11</sup> |
| IFI44L (interferon-induced protein 44-like; NM_001375646)                                                    | +9.6451                                                                      | 4.67x10 <sup>-6</sup>  |
| B, Downregulated genes                                                                                       |                                                                              |                        |
| Gene symbol (gene name; RefSeq accession number)                                                             | Fold increase/decrease<br>(BLID shRNA vs. scrambled<br>shRNA in MCF-7 cells) | P-value                |
| TIMP3 (TIMP metalloproteinase inhibitor 3; NM_000362)                                                        | -7.5953                                                                      | 3.95x10 <sup>-8</sup>  |
| HPGD [hydroxyprostaglandin dehydrogenase 15-(NAD); NM_000860]                                                | -5.3265                                                                      | 1.15x10 <sup>-7</sup>  |
| ANTXR1 (anthrax toxin receptor 1; NM_018153)                                                                 | -4.6439                                                                      | 7.12x10 <sup>-7</sup>  |
| SH3BGRL (SH3 domain binding glutamic acid-rich protein like; NM_003022)                                      | -4.1507                                                                      | 7.83x10 <sup>-10</sup> |
| KCNMA1 (potassium large conductance calcium-activated channel, subfamily M, $\alpha$ member 1; NM_001014797) | -3.9221                                                                      | 2.30x10 <sup>-7</sup>  |
| AFAP1L2 (actin filament associated protein 1-like 2; NM_001001936)                                           | -3.7661                                                                      | 3.34x10 <sup>-9</sup>  |
| SEPP1 (selenoprotein P, plasma, 1; NM_001085486)                                                             | -3.6776                                                                      | 0.000157               |
| GANAB (glucosidase, $\alpha$ ; neutral AB; NM_001278192)                                                     | -3.4326                                                                      | 0.00015                |
| CPE (carboxypeptidase E; NM_001873)                                                                          | -3.2373                                                                      | 9.90x10 <sup>-8</sup>  |

|                                                                     |         |                       |
|---------------------------------------------------------------------|---------|-----------------------|
| PAQR5 (progestin and adipoQ receptor family member V; NM_001104554) | -3.2328 | 2.91x10 <sup>-7</sup> |
|---------------------------------------------------------------------|---------|-----------------------|

The top 10 genes, upregulated or downregulated, are shown. P<0.05 was considered to indicate a statistically significant difference. shRNA, short hairpin RNA; RefSeq, Reference Sequence database; BLID, BH-3 like motif containing inducer of cell death; +, upregulated; -, downregulated.

Table SIV. RNA array analysis-based identification of top-ranked genes modulated in BLID shRNA- vs. scrambled control shRNA-transduced MDA-MB-231 cells.

| A, Upregulated genes                                                                    |                                                                          |                        |
|-----------------------------------------------------------------------------------------|--------------------------------------------------------------------------|------------------------|
| Gene symbol (gene name; RefSeq accession number)                                        | Fold increase/decrease (BLID shRNA vs. scrambled shRNA MDA-MD-231 cells) | P-value                |
| THBS1 (thrombospondin 1; NM_003246)                                                     | +6.9940                                                                  | 8.83x10 <sup>-13</sup> |
| S100P (S100 calcium binding protein P; NM_005980)                                       | +5.0140                                                                  | 3.33x10 <sup>-11</sup> |
| FLG (filaggrin; NM_002016)                                                              | +4.9439                                                                  | 1.65x10 <sup>-15</sup> |
| ID2 (inhibitor of DNA binding 2, dominant negative helix-loop-helix protein; NM_002166) | +4.6224                                                                  | 3.78x10 <sup>-10</sup> |
| CYP1B1 (cytochrome P450, family 1, subfamily B, polypeptide 1; NM_000104)               | +4.3772                                                                  | 5.30x10 <sup>-8</sup>  |
| BIRC3 (cIAP2) (baculoviral IAP repeat containing 3; NM_001165)                          | +4.3664                                                                  | 3.46x10 <sup>-10</sup> |
| TNFSF18 [tumor necrosis factor (ligand) superfamily, member 18; NM_005092]              | +3.9508                                                                  | 2.64x10 <sup>-10</sup> |
| SCG5 (secretogranin V; NM_001144757)                                                    | +3.8185                                                                  | 1.19x10 <sup>-5</sup>  |
| SOST (sclerostin; NM_025237)                                                            | +3.8057                                                                  | 3.85x10 <sup>-11</sup> |
| CSF1 (colony stimulating factor 1; NM_000757)                                           | +3.6480                                                                  | 1.03x10 <sup>-10</sup> |
| B, Downregulated genes                                                                  |                                                                          |                        |
| Gene symbol (gene name; RefSeq accession number)                                        | Fold increase/decrease (BLID shRNA vs. scrambled shRNA MDA-MD-231 cells) | P-value                |
| AKAP12 [a kinase (PRKA) anchor protein 12; NM_005100]                                   | -5.4342                                                                  | 2.79x10 <sup>-8</sup>  |
| PKIB [protein kinase (cAMP-dependent, catalytic) inhibitor β; NM_001270393]             | -4.7122                                                                  | 7.75x10 <sup>-8</sup>  |
| DFNA5 (deafness, autosomal dominant 5; NM_001127453)                                    | -3.8540                                                                  | 1.01x10 <sup>-10</sup> |
| MPP4 (membrane protein, palmitoylated 4; NM_033066)                                     | -3.8385                                                                  | 4.06x10 <sup>-11</sup> |
| PTN (pleiotrophin; NM_002825)                                                           | -3.7402                                                                  | 4.81x10 <sup>-13</sup> |
| CLGN (calmegin; NM_001130675)                                                           | -3.7212                                                                  | 5.20x10 <sup>-8</sup>  |
| KISS1 (KiSS-1 metastasis-suppressor; NM_002256)                                         | -3.5428                                                                  | 6.94x10 <sup>-8</sup>  |
| AOX1 (aldehyde oxidase 1; NM_001159)                                                    | -3.4550                                                                  | 3.26x10 <sup>-8</sup>  |
| CHRDL1 (chordin-like 1; NM_001143981)                                                   | -3.4327                                                                  | 8.40x10 <sup>-13</sup> |

|                                                         |         |                        |
|---------------------------------------------------------|---------|------------------------|
| LRRC8C (leucine rich repeat containing 8;<br>NM_032270) | -3.3912 | 2.90x10 <sup>-11</sup> |
|---------------------------------------------------------|---------|------------------------|

The top 10 genes, upregulated or downregulated, are listed. P<0.05 was considered to indicate a statistically significant difference. shRNA, short hairpin RNA; RefSeq, Reference Sequence database; BLID, BH-3 like motif containing inducer of cell death; +, upregulated; -, downregulated.

Table SV. Antibody array analysis-based identification of top-ranked proteins modulated in BLID shRNA- vs. scrambled control shRNA-transduced MCF-7 cells.

| Encoding gene symbol (encoding gene name)                                                | Swiss-Prot ID | Fold increase or decrease |
|------------------------------------------------------------------------------------------|---------------|---------------------------|
| TAF6 [TAF6 RNA polymerase II, TATA box binding protein (TBP)-associated factor, 80 kDa]  | P49848        | +2.9±0.1                  |
| PIK3CA (phosphoinositide-3-kinase, catalytic, $\alpha$ polypeptide)                      | P42336        | +2.7±0.5                  |
| CDH3 [cadherin 3, type 1, P-cadherin (placental)]                                        | P22223        | +2.5±0.4                  |
| TP63/p73L (tumor protein p73-like)                                                       | Q9UBV9        | +2.4±0.5                  |
| CLTC [clathrin, heavy polypeptide (Hc)]                                                  | Q00610        | +2.4±0.2                  |
| APEX1 [APEX nuclease (multifunctional DNA repair enzyme) 1]                              | P27695        | +2.3±0.2                  |
| ITPR3 (inositol 1,4,5-triphosphate receptor, type 3)                                     | Q14573        | +2.3±0.0                  |
| HSPE1 [heat shock 10 kDa protein 1 (chaperonin 10)]                                      | Q04984        | +2.2±0.4                  |
| DEK [DEK oncogene (DNA binding)]                                                         | P35659        | +2.2±0.1                  |
| TUBB2A (tubulin, $\beta$ polypeptide)                                                    | Q13885        | +2.2±0.2                  |
| ARHGAP1 (Rho GTPase activating protein 1)                                                | Q07960        | +2.2±0.1                  |
| NME1 [non-metastatic cells 1, protein (NM23A) expressed in]                              | P15531        | +2.2±0.2                  |
| STK4 (serine/threonine kinase 4)                                                         | Q13043        | +2.1±0.2                  |
| GTF2I (general transcription factor II, i)                                               | P78347        | +2.1±0.1                  |
| RBP4 (retinol binding protein 4, plasma)                                                 | P02753        | +2.1±0.2                  |
| GLUL [glutamate-ammonia ligase (glutamine synthase)]                                     | P15104        | +2.0±0.2                  |
| MAPK1 (mitogen-activated protein kinase 1)                                               | P28482        | -3.0±0.5                  |
| CDK2 (cyclin-dependent kinase 2)                                                         | P24941        | -2.5±0.3                  |
| CYBB/NOX2 (cytochrome b-245, $\beta$ polypeptide)                                        | P04839        | -2.4±0.1                  |
| IL-3 [interleukin 3 (colony-stimulating factor, multiple)]                               | P08700        | -2.4±0.3                  |
| ARHGDI1 [Rho GDP dissociation inhibitor (GDI) $\beta$ ]                                  | P52566        | -2.3±0.3                  |
| GEMIN2 (survival of motor neuron protein interacting protein 1)                          | O14893        | -2.3±0.3                  |
| LCK (lymphocyte-specific protein tyrosine kinase)                                        | P06239        | -2.2±0.2                  |
| AIMP1 [small inducible cytokine subfamily E, member 1 (endothelial monocyte-activating)] | Q12904        | -2.1±0.1                  |
| G3BP1 (Ras-GTPase-activating protein SH3-domain-binding protein)                         | Q13283        | -2.1±0.3                  |
| BCAT1 (branched chain aminotransferase 1, cytosolic)                                     | P54687        | -2.1±0.2                  |
| DHX16 [DEAH (Asp-Glu-Ala-His) box polypeptide 16]                                        | O60231        | -2.1±0.2                  |
| ROCK2 (Rho-associated, coiled-coil containing protein kinase2)                           | Q62868        | -2.0±0.1                  |
| PLCB1 [phospholipase C, $\beta$ 1 (phosphoinositide-specific)]                           | Q9NQ66        | -2.0±0.3                  |
| XRCC6 [thyroid autoantigen 70 kDa (Ku antigen)]                                          | P12956        | -2.0±0.1                  |

Proteins showing fold change +2.0 and higher or -2.0 or lower are listed. shRNA, short hairpin RNA; Swiss-Prot ID, Swiss-Prot protein database identification; BLID, BH-3 like motif containing inducer of cell death; +, increase; -, decrease.

Table SVI. Antibody array analysis-based identification of top-ranked proteins modulated in BLID shRNA- vs. scrambled control shRNA-transduced MDA-MB-231 cells.

| Encoding gene symbol (encoding gene name)                  | Swiss-Prot ID | Fold increase or decrease |
|------------------------------------------------------------|---------------|---------------------------|
| SYT1 (synaptotagmin I)                                     | P21579        | +2.8±0.3                  |
| CASP4 (caspase 4, apoptosis-related cysteine protease)     | P49662        | +2.3±0.1                  |
| JUP (junction plakoglobin)                                 | P14923        | +2.2±0.0                  |
| NUP62 (nucleoporin 62 kDa)                                 | P37198        | +2.1±0.2                  |
| CDKN1C [cyclin-dependent kinase inhibitor 1C (p57, Kip2)]  | P49918        | +2.1±0.0                  |
| MCL1 [myeloid cell leukemia sequence 1 (BCL2-related)]     | Q07820        | +2.1±0.2                  |
| IL-3 [interleukin 3 (colony-stimulating factor, multiple)] | P08700        | -2.8±0.5                  |
| PSIP1 (PC4 and SFRS1 interacting protein 1)                | O95368        | -2.6±0.3                  |
| PLK3 (cytokine-inducible kinase)                           | Q9H4B4        | -2.6±0.1                  |
| TP73 (tumor protein p73)                                   | O15350        | -2.5±0.3                  |
| JAK1 [Janus kinase 1 (a protein tyrosine kinase)]          | P23458        | -2.5±0.1                  |
| E1A_ADE05 (adenovirus 5E1A)                                | P03255        | -2.3±0.2                  |
| STRN (striatin, calmodulin binding protein)                | O43815        | -2.0±0.3                  |

Proteins showing fold change +2.0 and higher or -2.0 or lower are listed. . shRNA, short hairpin RNA; Swiss-Prot ID, Swiss-Prot protein database identification; BLID, BH-3 like motif containing inducer of cell death; +, increase; -, decrease.

Table SVII. Antibody array analysis-based identification of top-ranked proteins modulated in BLID shRNA- vs. scrambled control shRNA-transduced MDA-MB-468 cells.

| Encoding gene symbol (encoding gene name)                                                     | Swiss-Prot ID | Fold increase or decrease |
|-----------------------------------------------------------------------------------------------|---------------|---------------------------|
| PIK3CA (phosphoinositide-3-kinase, catalytic, $\alpha$ polypeptide)                           | P42336        | +5.8 $\pm$ 0.4            |
| GTF2I (general transcription factor II, I)                                                    | O15359        | +5.0 $\pm$ 0.2            |
| E2F1 (E2F transcription factor 1)                                                             | Q01094        | +3.4 $\pm$ 0.1            |
| GOLGA4 (golgi autoantigen, golgin subfamily a, 4)                                             | Q13439        | +3.3 $\pm$ 0.1            |
| PRKAR2B (protein kinase, cAMP-dependent, regulatory, type II, $\beta$ )                       | P31323        | +3.1 $\pm$ 0.2            |
| TAF6 [TAF6 RNA polymerase II, TATA box binding protein (TBP)-associated factor, 80 kDa]       | P49848        | +3.1 $\pm$ 0.5            |
| NME1 [non-metastatic cells 1, protein (NM23A) expressed in]                                   | P15531        | +2.9 $\pm$ 0.1            |
| MKK4/MAP2K4 (mitogen-activated protein kinase kinase 4)                                       | P45985        | +2.9 $\pm$ 0.0            |
| ATRN (attractin)                                                                              | O75882        | +2.8 $\pm$ 0.0            |
| XPO1 [exportin 1 (CRM1 homolog, yeast)]                                                       | O14980        | +2.7 $\pm$ 0.1            |
| DUSP4 (dual specificity phosphatase 4)                                                        | Q13115        | +2.7 $\pm$ 0.1            |
| ACM1 (cholinergic receptor, muscarinic 1)                                                     | P11229        | +2.7 $\pm$ 0.1            |
| AKAP1 [a kinase (PRKA) anchor protein 1]                                                      | Q92667        | +2.7 $\pm$ 0.0            |
| CCNDBP1 [cyclin D-type binding-protein 1 (Cyclin D1 binding protein 1)]                       | Q9NYH3        | +2.6 $\pm$ 0.2            |
| RPL22 (ribosomal protein L22)                                                                 | P35268        | +2.6 $\pm$ 0.2            |
| PCYOX (prenylcysteine lyase)                                                                  | Q9UHG3        | +2.6 $\pm$ 0.0            |
| UB2L3 (ubiquitin-conjugating enzyme E2L 3)                                                    | P68036        | +2.6 $\pm$ 0.2            |
| SLC9A3R1 [solute carrier family 9 (sodium/hydrogen exchanger), isoform 3 regulatory factor 1] | Q9JJ19        | +2.5 $\pm$ 0.1            |
| SYMPK (symplekin)                                                                             | Q92797        | +2.5 $\pm$ 0.1            |
| CASP9 (caspase 9, apoptosis-related cysteine protease)                                        | P55211        | +2.4 $\pm$ 0.3            |
| MPDZ (multiple PDZ domain protein)                                                            | O75970        | +2.4 $\pm$ 0.3            |
| MAPK8IP1 (mitogen-activated protein kinase 8 interacting protein 1)                           | Q9UQF2        | +2.4 $\pm$ 0.3            |
| CTSL (cathepsin L)                                                                            | P07711        | +2.3 $\pm$ 0.2            |
| NPAT (nuclear protein, ataxia-telangiectasia locus)                                           | Q14207        | +2.3 $\pm$ 0.3            |
| RASA1/RasGAP [RAS p21 protein activator (GTPase activating protein) 1]                        | P20936        | +2.3 $\pm$ 0.3            |
| RPS6KA1 (ribosomal protein S6 kinase, 90 kDa, polypeptide 1)                                  | Q15418        | +2.3 $\pm$ 0.3            |
| CDH5 [cadherin 5, type 2, VE-cadherin (vascular epithelium)]                                  | P33151        | +2.3 $\pm$ 0.1            |
| TUBB2 (tubulin, $\beta$ polypeptide)                                                          | Q13885        | +2.3 $\pm$ 0.3            |

|                                                                                     |        |          |
|-------------------------------------------------------------------------------------|--------|----------|
| MK167 (antigen identified by monoclonal antibody Ki-67)                             | P46013 | +2.3±0.2 |
| CHAF1A [chromatin assembly factor 1, subunit A (p150)]                              | Q13111 | +2.3±0.2 |
| STX11 (syntaxin 11)                                                                 | O75558 | +2.2±0.2 |
| KLK10 (kallikrein 10)                                                               | O43240 | +2.1±0.3 |
| CRMA (CrmA)                                                                         | P07385 | +2.1±0.1 |
| TSNAX (translin-associated factor X)                                                | Q99598 | +2.1±0.2 |
| TCF3 [transcription factor 3 (E2A immunoglobulin enhancer binding factors E12/E47)] | P15923 | +2.1±0.3 |
| IRS1 (insulin receptor substrate 1)                                                 | P35568 | +2.1±0.1 |
| AMACR ( $\alpha$ -methylacyl-CoA racemase)                                          | Q9UHK6 | +2.1±0.3 |
| CDC40 [cell division cycle 40 homolog (yeast)]                                      | O75471 | -2.4±0.1 |

Proteins showing fold change +2.0 and higher or -2.0 or lower are listed. . shRNA, short hairpin RNA; Swiss-Prot ID, Swiss-Prot protein database identification; BLID, BH-3 like motif containing inducer of cell death; +, increase; -, decrease.

Table SVIII. Transcriptome effects of BLID knockdown consistent in MCF-7 and MDA-MB-231 cells.

| Gene symbol (gene name; RefSeq accession number)    | Fold change (BLID shRNA vs. scrambled shRNA MCF-7 cells); P-value | Fold change (BLID shRNA vs. scrambled shRNA MDA-MB-231 cells); P-value |
|-----------------------------------------------------|-------------------------------------------------------------------|------------------------------------------------------------------------|
| THBS1 (thrombospondin 1; NM_003246)                 | +2.3381; 6.46x10 <sup>-5</sup>                                    | +6.9940; 8.83x10 <sup>-13</sup>                                        |
| CXCL2 [chemokine (C-X-C motif) ligand 2; NM_002089] | +2.7447; 0.000282                                                 | +2.9942; 0.0001209                                                     |
| WIF1 (WNT inhibitory factor 1; NM_007191)           | -2.1543; 0.002409                                                 | -3.1283; 5.53x10 <sup>-5</sup>                                         |
| TMEM64 (transmembrane protein 64; NM_001008495)     | -2.2738; 5.48x10 <sup>-11</sup>                                   | -2.6845; 2.52x10 <sup>-12</sup>                                        |
| JDP2 (Jun dimerization protein 2; NM_001135047)     | -2.1826; 6.18x10 <sup>-9</sup>                                    | -2.3741; 1.24x10 <sup>-9</sup>                                         |
| PRKX (protein kinase, X-linked; NM_005044)          | -2.1366; 6.92x10 <sup>-9</sup>                                    | -2.2756; 1.99x10 <sup>-9</sup>                                         |

P<0.05 was considered to indicate a statistically significant difference. shRNA, short hairpin RNA; RefSeq, Reference Sequence database; BLID, BH-3 like motif containing inducer of cell death; +, upregulated; -, downregulated.

Table SIX. Transcriptome effects of BLID knockdown consistent in BLID knockdown MCF-7 and LCC9 cells.

| Gene symbol (gene name; RefSeq accession number)                                  | Fold change (BLID shRNA vs. scrambled shRNA MCF-7 cells); P-value | Fold change (BLID shRNA vs. scrambled shRNA LCC9 cells); P-value |
|-----------------------------------------------------------------------------------|-------------------------------------------------------------------|------------------------------------------------------------------|
| IFIT2 (interferon-induced protein with tetratricopeptide repeats 2; NM_001547)    | +17.063; 1.70x10 <sup>-9</sup>                                    | +7.2135; 3.88x10 <sup>-7</sup>                                   |
| IFIT3 (interferon-induced protein with tetratricopeptide repeats 3; NM_001031683) | +16.6726; 2.05x10 <sup>-9</sup>                                   | +20.4356; 6.76x10 <sup>-10</sup>                                 |
| CMPK2 [cytidine monophosphate (UMP-CMP) kinase 2; NM_001256477]                   | +14.5695; 4.39x10 <sup>-9</sup>                                   | +6.9444; 5.30x10 <sup>-7</sup>                                   |
| IFIT1 (interferon-induced protein with tetratricopeptide repeats 1; NM_001270927) | +7.3012; 3.32x10 <sup>-5</sup>                                    | +29.4236; 2.60x10 <sup>-8</sup>                                  |
| SAMD9 (sterile $\alpha$ motif domain containing 9; NM_001193307)                  | +6.3386; 3.78x10 <sup>-6</sup>                                    | +2.4833; 0.004721                                                |
| OAS1 (2'-5'-oligoadenylate synthetase 1; NM_001032409)                            | +5.8863; 2.15x10 <sup>-8</sup>                                    | +6.2472; 1.30x10 <sup>-8</sup>                                   |
| XAF1 (XIAP associated factor 1; NM_017523)                                        | +5.8702; 4.50x10 <sup>-9</sup>                                    | +5.9303; 4.11x10 <sup>-9</sup>                                   |
| DDX60 [DEAD (Asp-Glu-Ala-Asp) box polypeptide 60; NM_017631]                      | +5.7172; 7.95x10 <sup>-6</sup>                                    | +6.4024; 3.57x10 <sup>-6</sup>                                   |
| IFI6 (interferon, $\alpha$ -inducible protein 6; NM_002038)                       | +2.6636; 0.000302                                                 | +7.4249; 3.57x10 <sup>-8</sup>                                   |
| AFAP1L2 (actin filament associated protein 1-like 2; NM_001001936)                | -3.7661; 3.34x10 <sup>-9</sup>                                    | -3.6520; 4.82x10 <sup>-9</sup>                                   |
| GANAB (glucosidase, $\alpha$ ; neutral AB; NM_001278192)                          | -3.4326; 0.00015                                                  | -3.7182; 7.64x10 <sup>-5</sup>                                   |
| PDZK1 (DZ domain containing 1; NM_001201325)                                      | -3.1047; 0.000609                                                 | -4.4397; 3.52x10 <sup>-5</sup>                                   |
| GJA1 (gap junction protein, $\alpha$ 1; NM_000165)                                | -2.8930; 8.13x10 <sup>-5</sup>                                    | -5.1430; 3.49x10 <sup>-7</sup>                                   |
| SPANXA1 (sperm protein associated with the nucleus, X-linked; NM_013453)          | -2.6123; 0.001506                                                 | -4.7876; 9.26x10 <sup>-6</sup>                                   |
| KLF12 (Kruppel-like factor 12; NM_007249)                                         | -2.3156; 1.47x10 <sup>-7</sup>                                    | -2.5897; 2.31x10 <sup>-8</sup>                                   |

|                                                                       |                                |                                 |
|-----------------------------------------------------------------------|--------------------------------|---------------------------------|
| RALGDS (Ral guanine nucleotide dissociation stimulator; NM_001042368) | -2.2944; 0.000492              | -2.6274; 0.000108               |
| SESN3 (sestrin 3; NM_001271594)                                       | -2.1031; 3.47x10 <sup>-6</sup> | -2.5052; 1.92x10 <sup>-7</sup>  |
| PRKX (protein kinase, X-linked; NM_005044)                            | -2.1364; 6.92x10 <sup>-9</sup> | -2.6864; 1.73x10 <sup>-11</sup> |

P<0.05 was considered to indicate a statistically significant difference. shRNA, short hairpin RNA; RefSeq, Reference Sequence database; BLID, BH-3 like motif containing inducer of cell death; +, upregulated; -, downregulated.

Table SX. Transcriptome effects of BLID knockdown consistent in BLID knockdown MDA-MB-231 and LCC9 cells.

| Gene symbol (gene name; RefSeq accession number)                          | Fold change (BLID shRNA vs. scrambled shRNA MDA-MB-231 cells); P-value | Fold change (BLID shRNA vs. scrambled shRNA LCC9 cells); P-value |
|---------------------------------------------------------------------------|------------------------------------------------------------------------|------------------------------------------------------------------|
| CYP1B1 (cytochrome P450, family 1, subfamily B, polypeptide 1; NM_000104) | +4.3772; 5.30x10 <sup>-8</sup>                                         | +2.1536; 0.000213                                                |
| NEGR1 (neuronal growth regulator 1; NM_173808)                            | -3.0517; 1.65x10 <sup>-6</sup>                                         | -2.1352; 0.000164                                                |
| NEURL1B (neuralized homolog 1B; NM_001142651)                             | -2.7064; 5.82x10 <sup>-10</sup>                                        | -2.5932; 1.17x10 <sup>-9</sup>                                   |
| GAD1 (glutamate decarboxylase 1; NM_000817)                               | -2.3636; 5.33x10 <sup>-7</sup>                                         | -3.2671; 4.73x10 <sup>-9</sup>                                   |
| PRKX (protein kinase, X-linked; NM_005044)                                | -2.2756; 1.99x10 <sup>-9</sup>                                         | -2.6864; 1.73x10 <sup>-11</sup>                                  |
| GPR161 (G protein-coupled receptor 161; NM_001267609)                     | -2.2197; 2.60x10 <sup>-6</sup>                                         | -1.9485; 2.41x10 <sup>-5</sup>                                   |
| SLITRK5 (SLIT and NTRK-like family, member 5; NM_015567)                  | -2.1966; 6.32x10 <sup>-8</sup>                                         | -2.0081; 3.62x10 <sup>-7</sup>                                   |
| UBE2D3 (ubiquitin-conjugating enzyme E2D 3; NM_003340)                    | -2.1601; 2.40x10 <sup>-5</sup>                                         | -2.2086; 1.71x10 <sup>-5</sup>                                   |
| PABPC4L [poly(A) binding protein, cytoplasmic 4-like; NM_001114734]       | -2.0070; 0.00021                                                       | -2.2722; 3.54x10 <sup>-5</sup>                                   |

P<0.05 was considered to indicate a statistically significant difference. shRNA, short hairpin RNA; RefSeq, Reference Sequence database; BLID, BH-3 like motif containing inducer of cell death; +, upregulated; -, downregulated.

Table SXI. Proteome effects of BH-3 like motif containing inducer of cell death (BLID) knockdown consistent in MCF-7 and MDA-MB-231 cells.

| Encoding gene symbol<br>(encoding gene name)                  | Swiss-Prot ID | MCF-7 cells (fold decrease) | MDA-MB-231 cells (fold decrease) |
|---------------------------------------------------------------|---------------|-----------------------------|----------------------------------|
| IL-3 [interleukin 3<br>(colony-stimulating factor, multiple)] | P08700        | -2.4±0.3                    | -2.8±0.5                         |

Swiss-Prot ID, Swiss-Prot protein database identification; -, downregulated.

Table SXII. Proteome effects of BH-3 like motif containing inducer of cell death (BLID) knockdown consistent in MCF-7 and MDA-MB-468 cell lines.

| Encoding gene symbol (encoding gene name)                                               | Swiss-Prot ID | MCF-7 cells (fold increase) | MDA-MB-468 cells (fold increase) |
|-----------------------------------------------------------------------------------------|---------------|-----------------------------|----------------------------------|
| PIK3CA (phosphoinositide-3-kinase, catalytic, $\alpha$ polypeptide)                     | P42336        | +2.7 $\pm$ 0.5              | +5.8 $\pm$ 0.4                   |
| TAF6 [TAF6 RNA polymerase II, TATA box binding protein (TBP)-associated factor, 80 kDa] | P49848        | +2.9 $\pm$ 0.1              | +3.1 $\pm$ 0.5                   |
| NME1 [non-metastatic cells 1, protein (NM23A) expressed in]                             | P15531        | +2.2 $\pm$ 0.2              | +2.9 $\pm$ 0.1                   |

Swiss-Prot ID, Swiss-Prot protein database identification; +, upregulated.

Table SXIII. Summary of miRNA array analysis: A subset of top-ranked human miRs showing changes in expression in BLID knockdown MDA-MB-231 and LCC9 breast cancer cells.

| A, MDA-MB-231 cells                        |                                                            |                       |
|--------------------------------------------|------------------------------------------------------------|-----------------------|
| Human microRNA                             | Fold change in miR level in BLID shRNA vs. Scr shRNA cells | P-value               |
| hsa-miR-27a-star                           | +3.37                                                      | 2.60x10 <sup>-5</sup> |
| hsa-miR-933                                | +4.31                                                      | 0.0025                |
| hsa-miR-4486                               | +3.62                                                      | 0.0046                |
| hsa-miR-3180-3p                            | +3.30                                                      | 0.0075                |
| hsa-miR-4649-5p <sup>a</sup>               | +3.28                                                      | 0.0092                |
| hsa-miR-1909                               | +3.24                                                      | 0.0006                |
| hsa-miR-3180                               | +3.16                                                      | 0.0071                |
| hsa-miR-4417                               | +3.10                                                      | 0.0008                |
| hsa-miR-1225-5p                            | +3.08                                                      | 0.0087                |
| hsa-miR-3197                               | +3.05                                                      | 0.0017                |
| hsa-miR-3187-3p <sub>st</sub> <sup>a</sup> | +2.63                                                      | 0.0118                |
| hsa-miR-3141 <sub>st</sub> <sup>a</sup>    | +2.57                                                      | 0.0136                |
| hsa-miR-3196 <sub>st</sub> <sup>a</sup>    | +2.24                                                      | 0.0065                |
| hsa-miR-4466 <sub>st</sub> <sup>a</sup>    | +2.22                                                      | 0.0008                |
| hsa-miR-4497 <sub>st</sub> <sup>a</sup>    | +2.12                                                      | 0.0025                |
| hsa-miR-4529-3p                            | -4.11                                                      | 0.0472                |
| hsa-miR-181c                               | -2.78                                                      | 0.0227                |
| hsa-miR-152                                | -2.74                                                      | 0.0005                |
| hsa-miR-7                                  | -2.63                                                      | 0.0122                |
| hsa-miR-518f-star                          | -2.62                                                      | 0.0001                |
| hsa-miR-330-3p                             | -2.41                                                      | 0.0041                |
| hsa-miR-422a                               | -2.23                                                      | 0.0006                |
| B, LCC9 cells                              |                                                            |                       |
| Human microRNA                             | Fold change in miR level in BLID shRNA vs. Scr shRNA cells | P-value               |
| hsa-miR-3141 <sub>st</sub> <sup>a</sup>    | +2.86                                                      | 0.0074                |
| hsa-miR-4649-5p <sub>st</sub> <sup>a</sup> | +2.80                                                      | 0.0196                |
| hsa-miR-4758-5p <sub>st</sub>              | +2.34                                                      | 0.0190                |
| hsa-miR-4281 <sub>st</sub>                 | +2.29                                                      | 0.0069                |
| hsa-miR-4725-3p <sub>st</sub>              | +2.20                                                      | 0.0039                |
| hsa-miR-2861 <sub>st</sub>                 | +2.20                                                      | 0.0038                |
| hsa-miR-4741 <sub>st</sub>                 | +2.17                                                      | 0.0101                |
| hsa-miR-4516 <sub>st</sub>                 | +2.14                                                      | 0.0029                |
| has-miR-4466 <sub>st</sub> <sup>a</sup>    | +2.09                                                      | 0.0015                |
| hsa-miR-3187-3p <sub>st</sub> <sup>a</sup> | +2.07                                                      | 0.0460                |

|                              |       |        |
|------------------------------|-------|--------|
| hsa-miR-4739_st              | +2.06 | 0.0025 |
| hsa-miR-3940-5p_st           | +2.05 | 0.0080 |
| hsa-miR-4497_st <sup>a</sup> | +2.02 | 0.0039 |
| hsa-miR-3196_st <sup>a</sup> | +2.01 | 0.0146 |
| hsa-miR-584_st               | -2.43 | 0.0253 |
| hsa-let-7g_st                | -2.24 | 0.0318 |

<sup>a</sup>Upregulation of these miRs was seen in both MDA-MB-231 and LCC9 cells. Upregulation of hsa-miR-27a-star was also seen in BLID knockdown LCC9 cells (+1.53; P=0.0396) and BLID knockdown MCF-7 cells (+2.46; P=0.0003). Downregulation of hsa-let-7g was also seen in BLID knockdown MCF-7 cells (-2.38; P=0.0418). Three Affymetrix GeneChip miRNA 3.0 arrays (part #902018) were used per treatment group. Fold change (BLID shRNA knockdown vs. scrambled shRNA control) >2 was used as a cut-off, P<0.05 (n=3). shRNA, short hairpin RNA; Scr, scrambled; BLID, BH-3 like motif containing inducer of cell death; miRNA/miR, microRNA; +, high in the BLID shRNA group; -, low in the BLID shRNA group.

Table SXIV. RNA array analysis-based identification of top canonical pathways, diseases and biofunctions in which BH-3 like motif containing inducer of cell death-centric mRNAs are implicated in breast cancer cells.

| A, Canonical pathway                                                                      |                                                   |                                               |
|-------------------------------------------------------------------------------------------|---------------------------------------------------|-----------------------------------------------|
| Pathway/disease/biofunction                                                               | P-value (MCF-7 cells)                             | P-value (MDA-MB-231 cells)                    |
| Interferon signaling <sup>a</sup>                                                         | 2.60x10 <sup>-13</sup>                            | N.L.                                          |
| Antigen presentation pathway                                                              | 1.49x10 <sup>-7</sup>                             | 0.0138                                        |
| Communication between innate and adaptive immune cells                                    | 1.55x10 <sup>-6</sup>                             | N.L.                                          |
| Role of pattern recognition receptors in recognition of bacteria and viruses <sup>b</sup> | 1.65x10 <sup>-6</sup>                             | N.S.                                          |
| Activation of IRF by cytosolic pattern recognition receptors <sup>c</sup>                 | 6.46x10 <sup>-6</sup>                             | N.L.                                          |
| Role of osteoblasts, osteoclasts and chondrocytes in rheumatoid arthritis                 | N.S.                                              | 1.13x10 <sup>-5</sup>                         |
| Molecular mechanisms of cancer                                                            | N.S.                                              | 1.72x10 <sup>-5</sup>                         |
| Hepatic fibrosis/hepatic stellate cell activation <sup>d</sup>                            | 0.0107                                            | 3.32x10 <sup>-5</sup>                         |
| Mouse embryonic stem cell pluripotency                                                    | N.L.                                              | 7.68x10 <sup>-5</sup>                         |
| TGF-β signaling                                                                           | N.S.                                              | 1.54x10 <sup>-4</sup>                         |
| B, Disease                                                                                |                                                   |                                               |
| Pathway/disease/biofunction                                                               | P-value (MCF-7 cells)                             | P-value (MDA-MB-231 cells)                    |
| Antimicrobial response <sup>e</sup>                                                       | 7.90x10 <sup>-4</sup> -<br>2.21x10 <sup>-29</sup> | N.L.                                          |
| Inflammatory response <sup>f</sup>                                                        | 4.70x10 <sup>-3</sup> -<br>2.21x10 <sup>-29</sup> | 1.18x10 <sup>-2</sup> -1.23x10 <sup>-8</sup>  |
| Infectious diseases <sup>g</sup>                                                          | 4.62x10 <sup>-3</sup> -<br>7.61x10 <sup>-17</sup> | 3.49x10 <sup>-3</sup> -5.91x10 <sup>-6</sup>  |
| Dermatological diseases and conditions <sup>h</sup>                                       | 4.19x10 <sup>-3</sup> -<br>9.78x10 <sup>-16</sup> | 9.6 x10 <sup>-3</sup> -1.03x10 <sup>-4</sup>  |
| Organismal injury and abnormalities <sup>i</sup>                                          | 4.84x10 <sup>-3</sup> -<br>9.78x10 <sup>-16</sup> | 1.15x10 <sup>-2</sup> -8.29x10 <sup>-10</sup> |
| Connective tissue disorders                                                               | 4.15x10 <sup>-3</sup> -<br>6.18x10 <sup>-7</sup>  | 9.70x10 <sup>-3</sup> -8.29x10 <sup>-10</sup> |
| Skeletal and muscular disorders                                                           | 4.03x10 <sup>-3</sup> -<br>6.18x10 <sup>-7</sup>  | 1.07x10 <sup>-2</sup> -8.29x10 <sup>-10</sup> |
| Cancer                                                                                    | 4.84x10 <sup>-3</sup> -<br>1.51x10 <sup>-13</sup> | 1.15x10 <sup>-2</sup> -4.18x10 <sup>-9</sup>  |
| Gastrointestinal disease                                                                  | 4.84x10 <sup>-3</sup> -<br>2.95x10 <sup>-7</sup>  | 1.13x10 <sup>-2</sup> -4.18x10 <sup>-9</sup>  |
| C, Biofunction                                                                            |                                                   |                                               |
| Pathway/disease/biofunction                                                               | P-value (MCF-7 cells)                             | P-value (MDA-MB-231 cells)                    |
| Cell signaling <sup>j</sup>                                                               | 3.82x10 <sup>-3</sup> -<br>2.94x10 <sup>-14</sup> | 1.14x10 <sup>-2</sup> -2.32x10 <sup>-3</sup>  |
| Cell death and survival <sup>k</sup>                                                      | 4.70x10 <sup>-3</sup> -<br>1.17x10 <sup>-9</sup>  | 1.14x10 <sup>-2</sup> -1.14x10 <sup>-6</sup>  |
| Cellular development                                                                      | 4.63x10 <sup>-3</sup> -<br>6.60x10 <sup>-9</sup>  | 1.09x10 <sup>-2</sup> -4.19x10 <sup>-9</sup>  |

|                                   |                                                  |                                               |
|-----------------------------------|--------------------------------------------------|-----------------------------------------------|
| Cellular movement <sup>l</sup>    | 4.81x10 <sup>-3</sup> -<br>1.37x10 <sup>-8</sup> | 1.18x10 <sup>-2</sup> -5.92x10 <sup>-13</sup> |
| Drug metabolism                   | 3.02x10 <sup>-3</sup> -<br>3.46x10 <sup>-7</sup> | 8.83x10 <sup>-3</sup> -8.83x10 <sup>-3</sup>  |
| Cellular growth and proliferation | 4.63x10 <sup>-3</sup> -<br>2.34x10 <sup>-6</sup> | 1.09x10 <sup>-2</sup> -4.19x10 <sup>-9</sup>  |
| Cellular function and maintenance | 4.9x10 <sup>-3</sup> -4.3x10 <sup>-5</sup>       | 1.05x10 <sup>-2</sup> -9.69x10 <sup>-7</sup>  |

Similar observations were made in RNA array analysis of LCC9 cells (P-values: <sup>a</sup>9.74x10<sup>-10</sup>; <sup>b</sup>1.98x10<sup>-4</sup>; <sup>c</sup>1.32x10<sup>-6</sup>; <sup>d</sup>1.45x10<sup>-3</sup>; <sup>e</sup>9.10x10<sup>-3</sup>-7.56x10<sup>-15</sup>; <sup>f</sup>9.10x10<sup>-3</sup>-7.56x10<sup>-15</sup>; <sup>g</sup>9.10x10<sup>-3</sup>-3.50x10<sup>-10</sup>; <sup>h</sup>9.10x10<sup>-3</sup>-1.29x10<sup>-11</sup>; <sup>i</sup>9.10x10<sup>-3</sup>-1.29x10<sup>-11</sup>; <sup>j</sup>8.43x10<sup>-3</sup>-1.31x10<sup>-8</sup>; 9.10x10<sup>-3</sup>-6.79x10<sup>-6</sup>; <sup>l</sup>9.10x10<sup>-3</sup>-6.89x10<sup>-8</sup>). N.L., not listed; N.S., not significant (>0.05).

Table SXV. Antibody array analysis-based identification of top canonical pathways, diseases and biofunctions in which BH-3 like motif containing inducer of cell death-centric proteins are implicated in breast cancer cells.

| A, Canonical pathway                                                  |                                               |                                               |
|-----------------------------------------------------------------------|-----------------------------------------------|-----------------------------------------------|
| Pathway/disease/biofunction                                           | P-value (MCF-7 cells)                         | P-value (MDA-MB-231 cells)                    |
| Breast cancer regulation by stathmin 1                                | 1.61x10 <sup>-8</sup>                         | 0.0021                                        |
| fMLP signaling in neutrophils                                         | 9.39x10 <sup>-7</sup>                         | 0.0107                                        |
| CCR3 signaling in eosinophils                                         | 1.10x10 <sup>-6</sup>                         | N.S.                                          |
| Gq signaling                                                          | 3.47x10 <sup>-6</sup>                         | N.L.                                          |
| Glioblastoma multiforme signaling                                     | 3.69x10 <sup>-6</sup>                         | N.S.                                          |
| Glucocorticoid receptor signaling                                     | 0.0014                                        | 3.40x10 <sup>-6</sup>                         |
| Production of nitric oxide and reactive oxygen species in macrophages | 0.0001                                        | 4.12x10 <sup>-6</sup>                         |
| ILK signaling                                                         | 0.0331                                        | 1.01x10 <sup>-4</sup>                         |
| MSP-RON signaling pathway                                             | 0.0051                                        | 1.05x10 <sup>-4</sup>                         |
| Dopamine receptor signaling pathway                                   | N.L.                                          | 1.24x10 <sup>-4</sup>                         |
| B, Disease                                                            |                                               |                                               |
| Pathway/disease/biofunction                                           | P-value (MCF-7 cells)                         | P-value (MDA-MB-231 cells)                    |
| Cancer <sup>a</sup>                                                   | 3.31x10 <sup>-3</sup> -6.03x10 <sup>-16</sup> | 3.85x10 <sup>-3</sup> -1.31x10 <sup>-11</sup> |
| Hematological disease <sup>b</sup>                                    | 3.26x10 <sup>-3</sup> -6.03x10 <sup>-16</sup> | 3.85x10 <sup>-3</sup> -1.31x10 <sup>-11</sup> |
| Immunological disease <sup>c</sup>                                    | 3.26x10 <sup>-3</sup> -6.03x10 <sup>-16</sup> | 3.85x10 <sup>-3</sup> -1.31x10 <sup>-11</sup> |
| Organismal injury and abnormalities <sup>d</sup>                      | 3.31x10 <sup>-3</sup> -6.03x10 <sup>-16</sup> | 3.85x10 <sup>-3</sup> -1.31x10 <sup>-11</sup> |
| Infectious diseases                                                   | 2.98x10 <sup>-3</sup> -7.36x10 <sup>-7</sup>  | 2.57x10 <sup>-3</sup> -3.48x10 <sup>-5</sup>  |
| Renal and urological disease                                          | 2.12x10 <sup>-3</sup> -2.73x10 <sup>-4</sup>  | 2.57x10 <sup>-3</sup> -1.04x10 <sup>-6</sup>  |
| C, Biofunction                                                        |                                               |                                               |
| Pathway/disease/biofunction                                           | P-value (MCF-7 cells)                         | P-value (MDA-MB-231 cells)                    |
| Cell death and survival <sup>e</sup>                                  | 2.98x10 <sup>-3</sup> -3.32x10 <sup>-10</sup> | 3.85x10 <sup>-3</sup> -1.77x10 <sup>-10</sup> |
| Cell cycle <sup>f</sup>                                               | 2.98x10 <sup>-3</sup> -2.97x10 <sup>-8</sup>  | 3.85x10 <sup>-3</sup> -1.49x10 <sup>-6</sup>  |
| Cellular movement                                                     | 2.98x10 <sup>-3</sup> -4.40x10 <sup>-8</sup>  | 3.85x10 <sup>-3</sup> -3.31x10 <sup>-5</sup>  |
| Gene expression <sup>g</sup>                                          | 2.72x10 <sup>-3</sup> -4.68x10 <sup>-7</sup>  | 3.85x10 <sup>-3</sup> -9.47x10 <sup>-7</sup>  |
| Cellular growth and proliferation <sup>h</sup>                        | 3.03x10 <sup>-3</sup> -3.78x10 <sup>-6</sup>  | 3.85x10 <sup>-3</sup> -9.28x10 <sup>-6</sup>  |
| Cellular development <sup>i</sup>                                     | 3.03x10 <sup>-3</sup> -3.74x10 <sup>-5</sup>  | 3.85x10 <sup>-3</sup> -5.67x10 <sup>-8</sup>  |
| Free radical scavenging                                               | 1.49x10 <sup>-3</sup> -1.49x10 <sup>-3</sup>  | 1.52x10 <sup>-3</sup> -1.36x10 <sup>-7</sup>  |
| Cell-to-cell signaling and interaction                                | 3.14x10 <sup>-3</sup> -5.77x10 <sup>-5</sup>  | 3.85x10 <sup>-3</sup> -8.07x10 <sup>-7</sup>  |

Similar observations were made in antibody array analysis of MDA-MB-468 cells (P-values: <sup>a</sup>1.47x10<sup>-2</sup>-5.99x10<sup>-18</sup>; <sup>b</sup>1.26x10<sup>-2</sup>-5.99x10<sup>-18</sup>; <sup>c</sup>1.26x10<sup>-2</sup>-5.99x10<sup>-18</sup>; <sup>d</sup>1.47x10<sup>-2</sup>-5.99x10<sup>-18</sup>; <sup>e</sup>1.31x10<sup>-2</sup>-1.50x10<sup>-7</sup>; <sup>f</sup>1.37x10<sup>-2</sup>-3.23x10<sup>-6</sup>; <sup>g</sup>1.21x10<sup>-4</sup>-4.68x10<sup>-6</sup>; <sup>h</sup>1.47x10<sup>-2</sup>-1.32x10<sup>-7</sup>; <sup>i</sup>1.29x10<sup>-2</sup>-1.32x10<sup>-7</sup>). N.L., not listed; N.S., not significant (>0.05).
